# Supplementary material
Source: Springer Nature journal article supplement (https://www.springermedizin.de/resource/supplementary/12967_2006_129_MOESM7_ESM.pdf/9575766)

**A**

**Absolute # of Cytokine<sup>+</sup> Pmel CD8<sup>+</sup> T cells  
per 1 x10<sup>6</sup> Splenocytes**

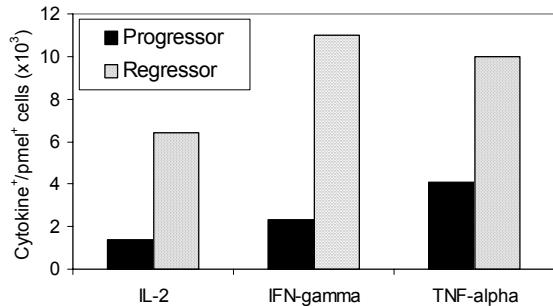**B**

**% of Cytokine<sup>+</sup> Pmel-1 CD8 T Cells**

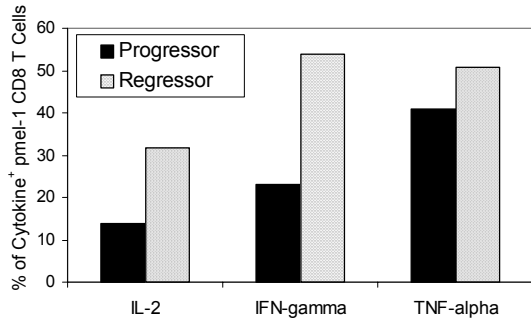

Supplement: MOESM7 [file 9575766]
